# Supplementary material for: Regional probabilistic risk assessment of heavy metals in different environmental media and land uses: An urbanization-affected drinking water supply area
Source: PubMed Central journal article supplement (PMC5109259; doi:10.1038/srep37084), 2016-11-15
Supplement: srep37084-s1.pdf [file srep37084-s1.pdf]

1 **Supporting information**

2 Regional probabilistic risk assessment of heavy metals in different environmental  
3 media and land uses: An urbanization-affected drinking water supply area

4

5

6 Chi Peng<sup>1</sup>, Yimin Cai<sup>1</sup>, Tiewu Wang<sup>1</sup>, Rongbo Xiao<sup>2</sup>, Weiping Chen<sup>1</sup>, \*

7

8

9

10

11 <sup>1</sup> State Key Laboratory of Urban and Regional Ecology, Research Center for  
12 Eco-environmental Sciences, Chinese Academy of Sciences, Beijing, 100085,  
13 People's Republic of China

14 <sup>2</sup> Guangdong Provincial Academy of Environmental Science, Guangdong 510045,  
15 China.

16

17

18

19 \* corresponding author

20 Tel: +86-010-62843981

21 E-mail address: [wpchen@rcees.ac.cn](mailto:wpchen@rcees.ac.cn) (*W.P. Chen*)

22

23

24 **Table and figure list**

25

26 **Table S1** Mean, ranges and distribution of the exposure parameters.

27

28 **Table S2** Mean and ranges of the contaminant-specific parameters.

29

30 **Fig. S1** Distribution of sampling sites along the Shunde Waterway. (Map source:  
31 DigitalGlobe)

32

33

34 Table S1 Mean, ranges and distribution of the exposure parameters.

| Variables                                                                        | Symbol     | Range                           | Distribution  |
|----------------------------------------------------------------------------------|------------|---------------------------------|---------------|
| Average body weight (kg)                                                         | $BW$       | 58.4 (43-77.1)                  | LN            |
| Exposure duration (yr)                                                           | $ED$       | 30                              | Deterministic |
| Averaging time (d)                                                               | $AT$       | 30×365                          | Deterministic |
| Exposure Frequency for indoor activities (day/yr)                                | $EF_{ia}$  | 350                             | Deterministic |
| Exposure Frequency for outdoor activities (day/yr)                               | $EF_{oa}$  | 225                             | Deterministic |
| Exposure Frequency for swimming (day/yr)                                         | $EF_{sd}$  | 18 (0-79)                       | Triangular    |
| Exposure time for swimming (hr/24 hr)                                            | $ET_{sd}$  | 2/24                            | Deterministic |
| Leaf vegetable water content                                                     | $\theta_v$ | 0.936 (0.905-0.956)             | Triangular    |
| Water-filled soil porosity (L <sub>water</sub> /L <sub>soil</sub> )              | $\theta_w$ | 0.25 (0.05-0.5)                 | LN            |
| Dry soil bulk density (g/cm <sup>3</sup> )                                       | $\rho_b$   | 1.5 (1.4-1.6)                   | Triangular    |
| Dilution factor                                                                  | $DF$       | 0.08 (0.022-0.27)               | LN            |
| Soil Ingestion Rate (mg/day)                                                     | $IR_s$     | 65 (1-200)                      | LN            |
| Sediment Ingestion Rate (mg/day)                                                 | $IR_{sd}$  | 50 (1-100)                      | LN            |
| Total Water Ingestion Rate (mL/day)                                              | $IR_w$     | 1957 (788-3650)                 | Triangular    |
| leaf vegetable ingestion rate (mg/day)                                           | $IR_v$     | 295 (110-416) × 10 <sup>3</sup> | Triangular    |
| Air inhalation rate (m <sup>3</sup> /day)                                        | $IR_a$     | 15.5 (11.6-19.7)                | Triangular    |
| Soil to skin adherence facotor for farmers (mg/cm <sup>2</sup> )                 | $AF_{sf}$  | 0.1 (0.01-0.4)                  | LN            |
| Soil to skin adherence facotor for adults (mg/cm <sup>2</sup> )                  | $AF_{sa}$  | 0.07 (0.01-0.3)                 | LN            |
| Sediment to skin adherence facotor (mg/cm <sup>2</sup> )                         | $AF_{sd}$  | 0.16 (0.01-1)                   | LN            |
| Skin surface area available for exposure in outdoor Activities (m <sup>2</sup> ) | $SA_{oa}$  | 0.495 (0.473-0.594)             | Triangular    |
| Skin surface area available for exposure in swimming (m <sup>2</sup> )           | $SA_{sd}$  | 1.5 (1.3-1.8)                   | Triangular    |
| Particulate Emission Factor (m <sup>3</sup> /kg)                                 | $PEF$      | 1.36×10 <sup>-9</sup>           | Deterministic |

35

36

37 Table S2 Mean and ranges of the contaminant-specific parameters.

|                | Hg                    | As                    | Cd                    | Zn                    | Pb                    | Cu                    | Cr                                                               | Ni                    |
|----------------|-----------------------|-----------------------|-----------------------|-----------------------|-----------------------|-----------------------|------------------------------------------------------------------|-----------------------|
| PUF (unitless) | 0.01 (0.0005-0.0716)  | 0.007 (0.00015-0.103) | 0.535 ± 0.667         | 0.176±0.191           | 0.019±0.01            | 0.116±0.054           | 0.016±0.017                                                      | 0.074±0.058           |
| $K_d$ (L/kg)   | 150 (52-200)          | 606 (125-1780)        | 400 (75-4300)         | 130 (62-530)          | 46622 ± 27808         | 2805 ± 948            | 3.7×10 <sup>6</sup> (1.8×10 <sup>6</sup> - 4.3×10 <sup>6</sup> ) | 250 (65-1900)         |
| $RfD_{ing}$    | 3.0×10 <sup>-4</sup>  | 3.0×10 <sup>-4</sup>  | 1.0×10 <sup>-3</sup>  | 3.0×10 <sup>-3</sup>  | 3.5×10 <sup>-3</sup>  | 4.0×10 <sup>-3</sup>  | 3.0×10 <sup>-3</sup>                                             | 2.0×10 <sup>-2</sup>  |
| $RfD_{inhal}$  | 8.6×10 <sup>-5</sup>  |                       |                       |                       |                       |                       | 2.9×10 <sup>-5</sup>                                             |                       |
| $RfD_{dermal}$ | 2.1×10 <sup>-5</sup>  | 1.2×10 <sup>-4</sup>  | 1.0×10 <sup>-5</sup>  | 6.0×10 <sup>-3</sup>  | 5.3×10 <sup>-4</sup>  | 1.2×10 <sup>-3</sup>  | 6.0×10 <sup>-5</sup>                                             | 5.4×10 <sup>-3</sup>  |
| $K_p$          | 1.00×10 <sup>-3</sup> | 1.00×10 <sup>-3</sup> | 1.00×10 <sup>-3</sup> | 6.00×10 <sup>-4</sup> | 1.00×10 <sup>-3</sup> | 1.00×10 <sup>-3</sup> | 1.00×10 <sup>-3</sup>                                            | 2.00×10 <sup>-4</sup> |
| ABS            | 0.03                  | 0.001                 | 0.001                 | 0.001                 | 0.001                 | 0.001                 | 0.001                                                            | 0.001                 |

38 PUF (unitless): Plant uptake factor, RfD (mg kg<sup>-1</sup> day<sup>-1</sup>): Chronic oral reference dose,  $K_d$  (L/kg): Soil-water partition coefficient,

39  $K_p$  (cm/hr): Dermal permeability constant, ABS (unitless): Dermal absorption factor

40

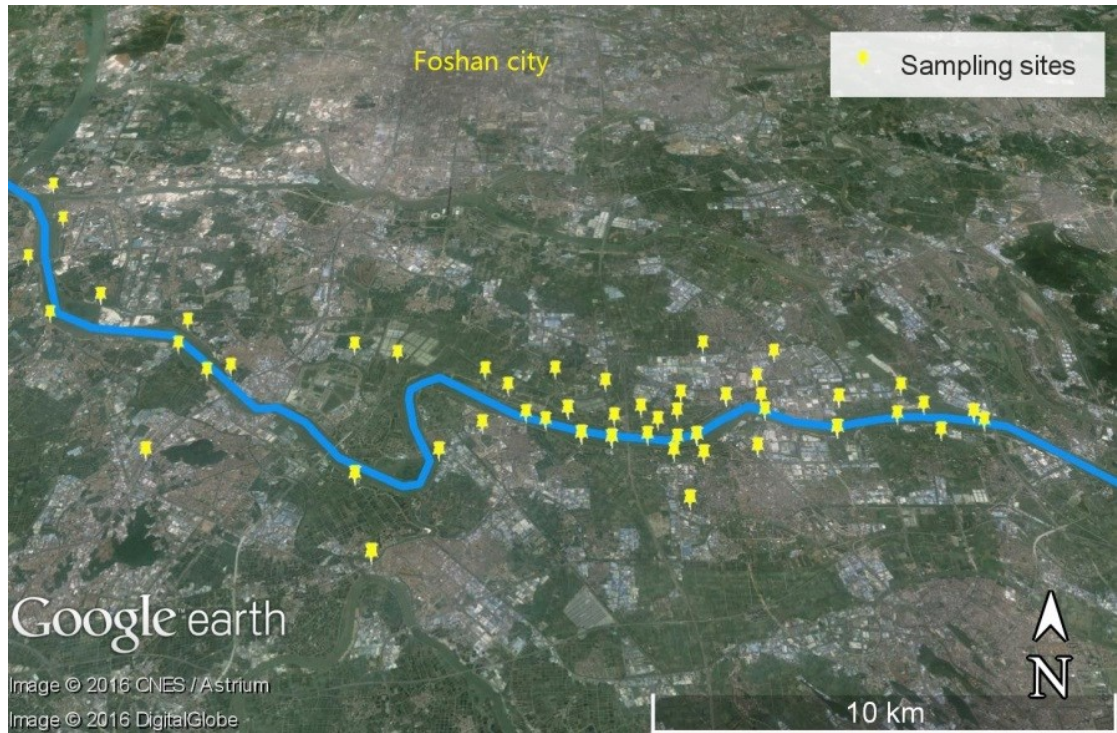

Fig. S1 Distribution of sampling sites along the Shunde Waterway. (Map source: DigitalGlobe)
